# Supplementary material
Source: Research Square preprint supplement (doi:10.21203/rs.3.rs-10092034/v1)
Supplement: Supplementary file 2 [file a0077a9f286879d600a467e5.docx]

## Supplementary Tables (S2)

**Table S2.1**. Sustainable Development Goals and their respective description adapted to the CG context **(Katila et al., 2019)**.

| **SDG** | **Potential CG contributions** | **Examples of indicators** |  |
| --- | --- | --- | --- |
| SDG1: No Poverty  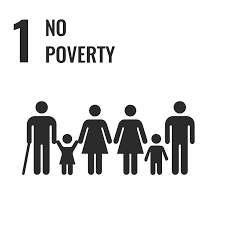 | **Strengthening** of social support networks and engagement with relevant political and community actors to promote socio-economic inclusion and change. | **1a.** Number of partnerships with social support institutions/associations *(partnerships/year)*  **1b.** Number of actions implemented in vulnerable neighbourhoods *(actions/year)* |  |
| SDG2: Zero Hunger  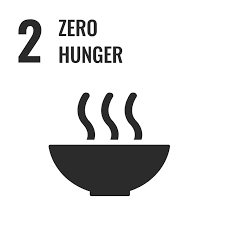 | **Alleviation** of food and nutritional insecurity; **increase** in the availability of fresh produce to local communities; **promotion** of agroecological practices . | **2a.** Amount of vegetables/fruits harvested per unit area *(kg/m²/year or kg/ha/year)*  **2b.** Amount of food donated to vulnerable communities *(kg/year)*  **2c.** Number of meals prepared with garden-grown and/or organic ingredients *(meals/year)*  **2d**. Number of people participating in shared meals *(persons/year)*  **2e**. Crop agrobiodiversity *(number of cultivated species and/or varieties/year)* |  |
| SDG3: Good Health and Well-Being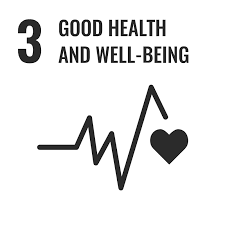 | **Promotion** of physical and mental health through hands-on activities; **encouragement** of healthy dietary habits; **strengthening** of social cohesion and inclusion. | **3a**. Number of volunteers engaged in practical gardening and maintenance activities *(persons/year)*  **3b.** Number of health- and well-being-related activities organized *(activities/year)*  **3c**. Self-reported well-being of participants *(mean score from survey; e.g. Likert scale 1–5)* |  |
| SDG4: Quality Education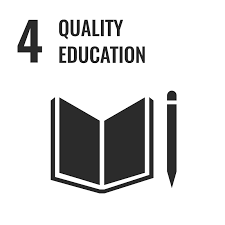 | **Provision** of educational activities with schools and institutions; **promotion** of outdoor and experiential learning opportunities. | **4a**. Number of schools and educational institutions supported by the project *(institutions/year)*  **4b**. Number of students participating in project activities *(students/year)*  **4c.** Number of educational visits/workshops hosted by the project *(activities/year)* |  |
| SDG5: Gender Equality  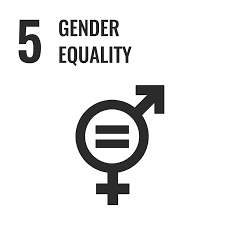 | **Empowerment** of women and girls; **promotion** of gender-balanced decision-making; **support** for inclusive participation and gender equality. | **5a**. Gender ratio among community members *(female:male or % by gender category)*  **5b**. Number of sub-projects or initiatives led by women *(projects/year)*  **5c.** Gender ratio among volunteers *(female:male or % by gender category)* |  |
| SDG6: Clean Water and Sanitation  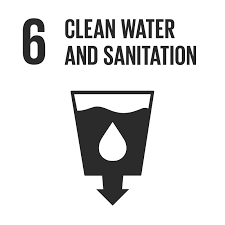 | **Promotion** of rainwater harvesting and storage; **implementation** of water-efficient irrigation and watering practices. | **6a.** Amount of rainwater harvested and reused in the garden *(L/year or m³/year)*  **6b**. Water consumption per kilogram of vegetables produced *(L/kg)* |  |
| SDG7: Affordable and Clean Energy  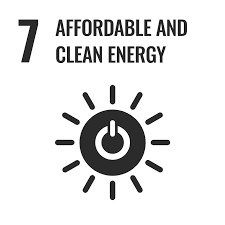 | **Promotion** of local energy communities and autonomous energy production; **encouragement** of non-fossil-fuel-based energy use. | **7a.** Share of renewable energy generated locally by the project *(% of total energy use/year)*  **7b.** Energy consumption per member *(kWh/member/year)*  **7c**. Total renewable energy produced on-site *(kWh/year)* |  |
| SDG8: Decent Work and Economic Growth  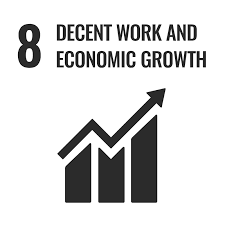 | **Creation** of qualified jobs in nature restoration, food production, social support, and education; **provision** of internships and opportunities for alternative economic models and local livelihoods. | **8a.** Number of paid jobs generated by the project *(jobs/year)*  **8b.** Number of internships hosted by the project *(internships/year)*  **8c**. Number of training or skill-development opportunities provided *(opportunities/year)* |  |
| SDG9: Industry, Innovation, and Infrastructure  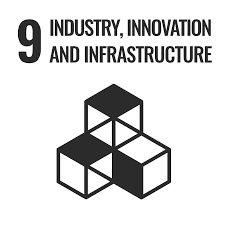 | **Promotion** of innovation through the development of new or reused technologies and strategies; **support** for action-research and experimental practices. | **9a**. Number of innovative technological or methodological outputs developed (outputs/year)  **9b.** Number of academic works or research projects linked to the garden (works/year)  **9c.** Number of new or improved infrastructures created using sustainable approaches (infrastructure units/year) |  |
| SDG10: Reduced Inequality  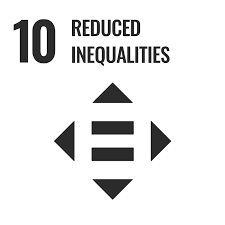 | **Promotion** of social inclusion of minorities and marginalized communities; **empowerment** of vulnerable groups; **valorization** of ancestral, traditional, and culturally diverse practices **(Malberg et al., 2020)**. | **10a**. Representation of LGBTQIA+ participants among members/participants *(% of total participants)*  **10b.** Representation of low-income participants in the project *(% of total participants)*  **10c**. Representation of participants under 30 years old *(% of total participants or persons/year)* |  |
| SDG11: Sustainable Cities and Communities  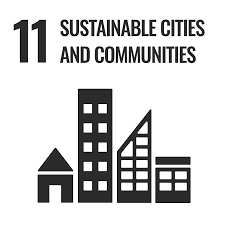 | **Improvement** of urban public space; **promotion** of sustainable mobility; **strengthening** of social cohesion; **enhancement** of resilience to climate change and extreme events. | **11a.** Share of members using sustainable commuting modes to access the garden *(% of members)*  **11b**. Proportion of permeable  surface area within the project area *(% of total area)*  **11c.** Tree canopy cover *(% of total area)*  11d. Vegetation index (e.g. NDVI) *(unitless index)*  11e. Surface or air temperature difference compared with surrounding urban areas *(°C)* |  |
| SDG12: Responsible Consumption and Production  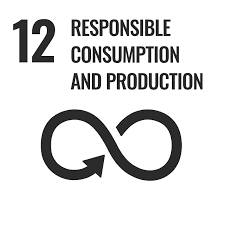 | **Promotion** of sustainable material consumption; **valorization** of organic residues; **application** of upcycling practices; **use** of local material sources. | **1**2a. Amount of compost produced *(kg/year)*  12b. Amount of organic residues reused as biomass or compost feedstock *(kg/year)*  12c. Amount of upcycled materials used to build or maintain infrastructure *(kg/year)*  12d. Share of locally sourced materials used in project activities *(% of total materials/year)* |  |
| SDG13: Climate Action  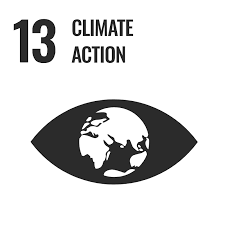 | **Implementation** of climate adaptation techniques; **provision** of environmental education; **promotion** of strategies to reduce the carbon footprint of food production and urban green spaces. | 13a. Amount of carbon sequestered in biomass and/or soil *(kg C/year or t CO₂e/year)*  13b. Soil organic matter content *(% dry weight)*  13c. Permeable surface area *(m² or % of total area)*  13d. Number of climate adaptation practices implemented *(practices/year)* |  |
| SDG14: Life Below Water  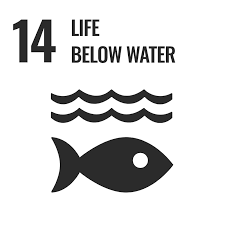 | **Reduction** of plastic waste leakage and **promotion** of waste prevention through reuse and upcycling practices | 14a. Amount of plastic waste avoided or reused through project activities *(kg/year)* |  |
| SDG15: Life on Land  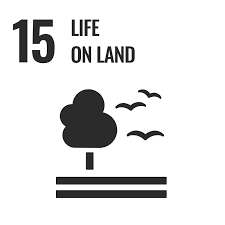 | **Promotion** of biodiversity; **improvement** of soil health; **restoration** of degraded urban land. | 15a. Biodiversity indices across multiple taxa *(index values/year; e.g. Shannon, Simpson, richness)*  15b. Soil biological activity or metabolism *(e.g. mg CO₂-C/kg soil/day)*  15c. Number of native plant species established *(species/year)*  15d. Area of restored or ecologically managed habitat *(m²/year)* |  |
| SDG16: Peace, Justice, and Strong Institutions  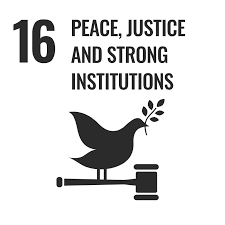 | **Promotion** of participatory and alternative decision-making models; **strengthening** of inclusive organizational systems; **enhancement** of community trust and empowerment. | 16a. Number of active members *(persons/year)*  16b. Number of meetings held *(meetings/year)*  16c. Number of participants actively involved in meetings *(persons/year)*  16d. Transparency index *(index score; define scale/methodology)* |  |
| SDG17: Partnerships for the Goals  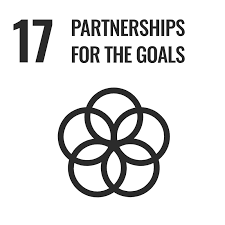 | **Establishment** of cross-sectoral partnerships between local actors and public institutions; **promotion** of support, knowledge exchange, and collaborative networks. | 17a. Number of partnerships with local projects and institutions *(partnerships/year)*  17b. Number of national and international networks in which the project participates *(networks/year)*  17c. Number of Erasmus+ or other exchange programmes linked to the project *(programmes/year)*  17d. Number of participants involved in exchange programmes *(persons/year)* |  |

### **Table S2.2.** Indicators selected to assess HortaFCUL’s contributions to the Sustainable Development Goals, their units of measure, framework of analysis and their source.

| **Sustainability dimension (P)** | **SDG** | **Indicator** | **Unit of measurement** | **Indicator framework** | **Data Source** |
| --- | --- | --- | --- | --- | --- |
|  |  |  |  |  |  |
| **People** | SDG 2 – Zero Hunger | Number of meals prepared with locally produced organic food | Number of meals per year | Temporal sequence | Project activity records |
|  | SDG 4 – Quality Education | Number of educational events | Number of events per year | Temporal sequence | Event archives and communication platforms |
|  |  | Number of participants in educational events | Mean number of participants per event | Temporal sequence | Attendance records |
| **Prosperity** | SDG 8 – Decent Work and Economic Growth | Amount of funds raised by the project | Euros (€) per year | Temporal sequence | Financial reports |
|  | SDG 11 – Sustainable Cities and Communities | Percentage of permeable surface | Percentage | Temporal sequence | Infrastructure monitoring records |
|  |  | Tree and shrub canopy cover | Area (m²) or percentage of project area | Campus baseline comparison | Remote sensing data / spatial analysis |
| **Planet** | SDG 12 – Responsible Consumption and Production | Amount of compost produced | Metric tonnes per year | Temporal sequence | Composting station records |
|  | SDG 13 – Climate Action | Soil organic matter content | Percentage | Campus baseline comparison | Biomass estimates / ecological models |
|  | SDG 15 – Life on Land | Species richness across major taxonomic groups | Number of species | Campus baseline comparison | Citizen science platforms and biodiversity surveys |
| **Peace** | SDG 16 – Peace, Justice and Strong Institutions | Number of active project members | Number of members per year | Temporal sequence | Internal membership records |
| **Partnerships** | SDG 17 – Partnerships for the Goals | Number of local, national and international partnerships | Number of partnerships | Temporal sequence | Institutional mobility records |
