# Supplementary material
Source: Research Square preprint supplement (doi:10.21203/rs.3.rs-10092034/v1)
Supplement: Supplementary file 3 [file b68a209a205317599b0021e9.docx]

## Indicator-specific methodologies (S1)

#### **SDG2:** Number of meals prepared with locally produced organic food

Since 2017, the majority of working days has been succeeded by a community dinner moment with a soup or equivalent dish. Between March 2020 and October 2021, no community dinner was held due to pandemic restrictions. There are no systematized records prior to 2023 on the number of community dinners and the amount of locally-grown food cooked on site. To address the gaps regarding this indicator between 2016 (start of the community dinners) and 2022 interviews with former guardians were conducted to identify the frequency of meals organized by the project as well as the relative abundance of locally-grown food in the ingredients used.

#### **SDG 4:** Number of educational events and number of participants

Information on educational events was compiled by reviewing the best available data sources: (1) social media accounts (namely Facebook, Whatsapp and Instagram), (2) email address and (3) direct surveys of the guardians. Each event was described as an activity type, which was categorized as: (1) “Workshop”, which includes courses, trainings and workshops; (2) “Tours” was assigned exclusively to guided tours; and (3) “Talks” to represent presentations, talks and debates. For each event’s entry, the following indicators were identified: (1) number and name of the guardians implied directly in the organization of the event; (2) number and name of partners involved; (3) amount of time invested in the event; (4) date of the occurrence; (5) number of participants. The number of participants was estimated through photographic records of these events in social media. For events listed since 2010 that had no participation data (ca. 27%) the number of participants was interpolated using the mean of all events.

#### **SDG 8:** Amount of funds raised by the project

As an informal project, the case study has developed and tested the Gift Economy model **(Thygesen 2019).** This study identified three main funding sources based on member feedback: donations, community dinners and irregular funding programs. Data was retrieved from the e-mails sent to the guardians group using keyword search. Some of the main words included in this search were “money” (and other vernacular words used to refer to money in Portuguese), “funds”, “dinners”, “gift”, “donation”, “euros” and “raised”, as well as the symbol “€”. Only records after 2014 were considered in this search due to data deficiency issues prior to that year. Any concrete values were registered and estimates were made for the periods in which there was no available information. All the minutes from meetings were also added to this search to complement gaps in the record. To add any missing information from the e-mail, we also conducted personal interviews with older community members to identify other potential sources of funding.

#### **SDG 11:** Percentage of tree and shrub canopy cover

To assess the impact of HortaFCUL regarding temperature regulation within the campus area, tree cover data from 2024 was used as a surrogate for the cooling effect provisioned by large trees in the surrounding environment **(Liu et al. 2025)**. Tree covers were measured for four areas (Project 1, Project 2, Project 3 and Campus Plots) via satellite imagery and ground-proofed by canopy estimation through ellipses derived from the largest and smallest diameter **(Porto et al. 2013)**. Campus plots were divided into “organic” areas, that is, areas close and connected enough to be considered a unit. Additionally, the underlayer cover was measured *in situ*, since more complex vegetation structure can be more effective in terms of temperature regulation **(Ferrini et al. 2020).** Graphic representation of the tree cover across the campus green areas and Projects 1, 2 and 3 was achieved using a violin boxplot, which adds a smoothed density curve to reveal the distribution of the data. To complement this plot, a dummy depiction of the average tree cover in campus green areas and the three projects was computed using the Geometry Generator available at QGIS software **(QGIS Development Team 2025)**. Based on the mean number of trees in each area and the total percentage cover, circular silhouettes were drawn randomly simulating tree canopy for a 10m-side square.Tree canopy circles represent the percentage of tree canopy in a 100m2 plot area, which also includes juxtaposed tree layers.

#### **SDG 11:** Percentage of permeable surface area

The intervention areas before the start of the permaculture garden project consisted of vacant green lots dominated by lawns and construction debris, resulting in highly compacted soils with limited ecological function. To increase water retention capacity, soil amendment interventions were conducted through the years with the addition of biomass, compost and mineral substrates. We used photographic records posted on social media since 2012 as evidence of the gradual transformation of the spaces taken over by the project. QGIS software was used **(QGIS Development Team 2025)** to further calculate the polygon areas based on these records per year in the form of percentage relative to the totality of campus green areas.

#### **SDG 12:** Amount of compost produced

Project 2’s composting station consists of three compartments, each one with a volume of 4m3. The time period between the first piling and the compost sieving is on average 4 to 6 months. Data on compost production was collected during the station’s first year (2016-2017, **Florian Ulm, unpublished data**), and during 2019, as part of a Master’s research work (**Horta 2021).** These two data sources were used to extrapolate production volume from 2016 to 2023. According to guardians’ feedback on the process, in this period compost production remained more or less constant (with a slight decrease during the pandemic). Average compost pile production was set to five piles a year based on this same feedback.

Adding to this, the case study hosts 8 vermicomposting containers with 1.5m3 volume since 2021. On average, it takes about 1 month to fill a container with organic residuals (with alternate layers of “browns”, such as dead leaves). Thus, estimates based on the above-mentioned averages were only computed to include the period between September 2021 and December 2023. Vermicompost density estimates were based on a previous work, which set a value of 0.65kg/dm3 **(Gil Penha-Lopes & David Avelar, unpublished data).**

#### **SDG 13:** Percentage of soil organic matter

Study sites were selected to represent contrasting management strategies, namely conventional lawns and permaculture-based agroforests, capturing a gradient of structural complexity: a conventionally managed lawn, a managed lawn interspersed with trees, and two permaculture systems (Projects 2 and 3). Previous surveys documented differences among sites in relative tree cover and plant diversity, with permaculture systems exhibiting increased values in both measures **(Vaz Pato et al., 2024).**

In each site, five sampling spots were chosen, distributed across each corner and the centre to cover the complete area. Soil samples were collected following, with minor adjustments, the LUCAS guidelines **(Fernández-Ugalde et al. 2017).** At each sampling spot, five subsamples were taken and combined into one composite sample. Composite samples were collected at two depths: 0–10 cm and 10–20 cm. Samples were air-dried for two weeks, weighed, and sieved to <2 mm.

To estimate soil organic matter (SOM) a loss on ignition method was used **(Heiri et al. 2001):** for each sample ~ 5 g (4,990 - 5,010 g) of soil was weighed accurately (SWB) with a precision scale, placed into a crucible and burned in a muffle furnace (L3, Nabertherm, Lilienthal, Germany) at 550 °C for 4 h. Afterwards, the samples were weighed again at room temperature (SWA) to obtain weight difference which equates the soil organic matter present:

From this absolute SOM was calculated:

All statistical analysis was done using R version 4.5.0 software **(R Core Team 2025)** and R studio **(Posit 2025)**. To evaluate the differences between sites for this particular indicator, all data was checked for normality with the Shapiro-Wilk test and tested for homogeneity of variances with Levene’s test. Both assumptions were not met with this data and, thus, we applied non-parametric tests (Kruskal-Wallis followed by a Dunn’s test) as post-hoc comparisons.

.

#### **SDG 15:** Species richness across major taxonomic groups

Between September 2020 and July 2025, the citizen science project “+Biodiversidade @CIÊNCIAS” organized several biodiversity identification events which covered the whole area of the campus and the surroundings (**Chozas et al. 2023)**. These observations were assessed at the project page on the iNaturalist platform (<https://www.inaturalist.org/observations?project_id=biodiversidade-ciencias&subview=map>) and data were downloaded for a quadrilateral polygon surrounding the campus. Data was exported to QGIS **(QGIS Development Team 2025)** and a more precise delimitation of the campus perimeter was made by intersecting it with the observations. We retrieved a total of 4216 observations from a wide range of taxa, of which 58.1% were of research quality, attesting to their robustness.

Polygons were drawn for the three main projects at HortaFCUL and all green areas on campus, and buffers of 5 m were created around these polygons, excluding overlapped areas. The number of unique species (alpha species richness) was counted for both campus green areas and Projects 1, 2 and 3 for four major taxonomic groups: Insecta, Plantae, Fungi and Aves. Campus green areas were divided into “organic” areas, that is, areas close and connected enough to be considered a unit. All the species registered in these organic areas were counted (Plantae, Insecta and Total) and only individuals identified to species level were included. For Plantae and Insecta, the number of common species to both project areas and campus green areas (gamma species richness), as well as species exclusively identified in each of them (Common, Only campus, Only case study), was also calculated due to the relevance of these two groups for urban landscapes **(McIntyre 2000; Kohsaka et al. 2013)**.

As observation effort differed between site groups (N obs./100 m² = 17.8 in Horta and 4.9 on campus), species accumulation curves were drawn to estimate plant richness **(vegan package; R Core Team, see Fig. S3.6)**.

#### **SDG 16:** Number of active members

To retrieve information on the number of members and their degree of participation in the project, the e-mail chat group (created in 2011) was accessed and all the meeting minutes since 2014 were thoroughly analyzed. For each year we identified the members for which there was any evidence of autonomous and active participation (presence in meetings, facilitation of events, regular involvement on working days), as well as their gender. The data collection was followed by personal interviews with older members to validate the available information. The number of meetings (calculated based on the number of minutes published at the chat group) was added in order to complement this indicator.

#### **SDG 17:** Number of local, national and international partnerships

To collect data for this indicator, a similar approach was followed as in *3.3.1*. *Number of educational events*. We considered “Partnerships” as all the events in which the case study provided any logistic or social support to another project in the form of sponsorships, resources and information. In this category we include other projects' visits to the case study areas, involvement in exchange networks and events and direct support of a project's ongoing activity. All the partners were classified as “local” (campus, city or regional level partners), “national” (transregional Portuguese partners) and “international” (any partner located outside Portugal).

**SUPPLEMENTARY REFERENCES**

Chozas S, Nunes A, Serrano HC, et al (2023) Rescuing Botany: using citizen-science and mobile apps in the classroom and beyond. NPJ Biodivers 2:6.<https://doi.org/10.1038/s44185-023-00011-9>

Corrêa CJP, Tonello KC, Nnadi E (2021) Urban Gardens and Soil Compaction: a Land Use Alternative for Runoff Decrease. Environmental Processes 8:1213–1230. <https://doi.org/10.1007/s40710-021-00521-3>

Fernandez UO, Orgiazzi A, Jones A, et al (2017) LUCAS 2018 - SOIL COMPONENT: Sampling Instructions for Surveyors. In: JRC Publications Repository. <https://publications.jrc.ec.europa.eu/repository/handle/JRC105923>. (accessed 11 June 2025)

Ferrini F, Fini A, Mori J, Gori A (2020) Role of Vegetation as a Mitigating Factor in the Urban Context. Sustainability 12:. <https://doi.org/10.3390/su12104247>

Heiri O, Lotter AF, Lemcke G (2001) Loss on ignition as a method for estimating organic and carbonate content in sediments: reproducibility and comparability of results. Journal of Paleolimnology 25:101–110. <https://doi.org/10.1023/A:1008119611481>

Horta, MN (2021) Does community scale composting produce a viable outcome? Some physical and chemical properties of green waste composts produced in the Faculty of Sciences campus (Master's thesis, Universidade de Évora).

Kohsaka R, Pereira HM, Elmqvist T, et al (2013) Indicators for Management of Urban Biodiversity and Ecosystem Services: City Biodiversity Index. In: Elmqvist T, Fragkias M, Goodness J, et al. (eds) Urbanization, Biodiversity and Ecosystem Services: Challenges and Opportunities: A Global Assessment. Springer Netherlands, Dordrecht, pp 699–718

Liu F, Wang L, Cao Q, et al (2025) Quantifying the cooling benefits driven by global urban tree cover restoration. Applied Geography 185:103798. <https://doi.org/10.1016/j.apgeog.2025.103798>

McIntyre NE (2000) Ecology of Urban Arthropods: A Review and a Call to Action. Ann Entomol Soc Am 93:825–835. <https://doi.org/10.1603/0013-8746(2000)093%255B0825:EOUAAR%255D2.0.CO;2>

Porto M, Correia O, Beja P (2013) Modelling fuel succession in Mediterranean cork oak forests along a 70-year chronosequence. Forest Ecology and Management 302:221–230. <https://doi.org/10.1016/j.foreco.2013.03.028>

Posit team (2025) RStudio: Integrated Development Environment for R. Posit Software, PBC, Boston, MA. URL <http://www.posit.co/>.

QGIS Development Team (2025) QGIS Geographic Information System. *Open Source Geospatial Foundation Project.* <http://qgis.org>

R Core Team. (2024) R: A Language and Environment for Statistical Computing. *R Foundation for Statistical Computing*, Vienna, Austria. URL: [https://www.R-project.org/](https://www.r-project.org/)

Thygesen N (2019) The gift economy and the development of sustainability. Local Economy 34:493–509. <https://doi.org/10.1177/0269094219882261>
